# Supplementary material
Source: HighWire-hosted journal article supplement (https://jnm.snmjournals.org/highwire/filestream/94237/field_highwire_adjunct_files/0/88203_Supplemental_Data-sn.pdf)
Supplement: 88203_Supplemental_Data-sn.pdf [file 88203_Supplemental_Data-sn.pdf]

**Supplemental Table 1** Patient information and disease descriptions

| Patient | Age | Sex | Disease Site(s)                                                                                                                                     |
|---------|-----|-----|-----------------------------------------------------------------------------------------------------------------------------------------------------|
| 1       | 26  | F   | neuroendocrine tumor, right maxillae with metastasis to the left mastoid, both thyroid lobes, left subdiaphragmatic and lower intraabdominal region |
| 3       | 68  | M   | neuroendocrine tumor, primary unknown, lung, mediastinum and bone metastases                                                                        |
| 10      | 63  | F   | carcinoid, duodenum                                                                                                                                 |
| 17      | 63  | M   | carcinoid, small bowel, inguinal and paraaortic lymph nodes                                                                                         |
| 19      | 71  | F   | carcinoid, large bowel, local recurrence, liver and lymph node metastases                                                                           |
| 21      | 30  | F   | paraganglioma – tumor localized paravertebralis, level of Th10-11                                                                                   |
| 22      | 27  | M   | neuroendocrine carcinoma, skull base tumor                                                                                                          |
| 23      | 54  | F   | neuroendocrine tumor, pancreas                                                                                                                      |
| 24      | 71  | M   | neuroendocrine tumor, small bowel                                                                                                                   |
| 25      | 75  | F   | neuroendocrine tumor, primary unknown, liver metastasis                                                                                             |
| 27      | 71  | M   | neuroendocrine carcinoma, left parotid, mediastinum metastases                                                                                      |
| 28      | 70  | M   | neuroendocrine tumor, small bowel, metastasis to the liver                                                                                          |

**Supplemental Table 2** Normal organ masses for males, females and corresponding reference phantom values

|         |                    | Organ Mass (g) |            |              |            |
|---------|--------------------|----------------|------------|--------------|------------|
|         |                    | L. Kidney      | R. Kidney  | Liver        | Spleen     |
| Males   | Mean +/- SD        | 177 +/- 22     | 169 +/- 30 | 1693 +/- 411 | 276 +/- 97 |
|         | Range              | 141 – 209      | 126 – 212  | 1158 – 2553  | 82 – 422   |
|         | Reference Phantom* | 150            | 150        | 1910         | 183        |
| Females | Mean +/- SD        | 127 +/- 29     | 138 +/- 31 | 1549 +/- 408 | 228 +/- 85 |
|         | Range              | 81 – 187       | 86 – 194   | 1072 – 2603  | 123 – 362  |
|         | Reference Phantom  | 138            | 138        | 1400         | 150        |

\*The reference phantom values come from the phantom series of Cristy and Eckerman (1) and from Stabin et al. (2).

## REFERENCES

1. Cristy M, Eckerman K. *Specific absorbed fractions of energy at various ages from internal photons sources*. Oak Ridge, TN: Oak Ridge National Laboratory; 1987. V1-V7. ORNL/TM-8381.
2. Stabin M, Watson E, Cristy M. *Mathematical models and specific absorbed fractions of photon energy in the nonpregnant adult female and at the end of each trimester of pregnancy*. Oak Ridge, TN: Oak Ridge National Laboratory; 1995. ORNL report ORNL/TM-12907.
